# Supplementary material
Source: publisher site journal article supplement (https://www.dovepress.com/article/569143)

**Supplemental Figure 1.** Propensity score density distributions before and after matching.

Density plots illustrate the distribution of propensity scores for the ketamine cohort (Cohort 1) and the control cohort (Cohort 2) before matching (left panel) and after 1:1 propensity score matching (right panel). Prior to matching, the distributions demonstrate partial separation between cohorts, indicating baseline imbalance. After matching, near-complete overlap is observed, confirming successful covariate balance between groups and adequacy of the matching procedure.

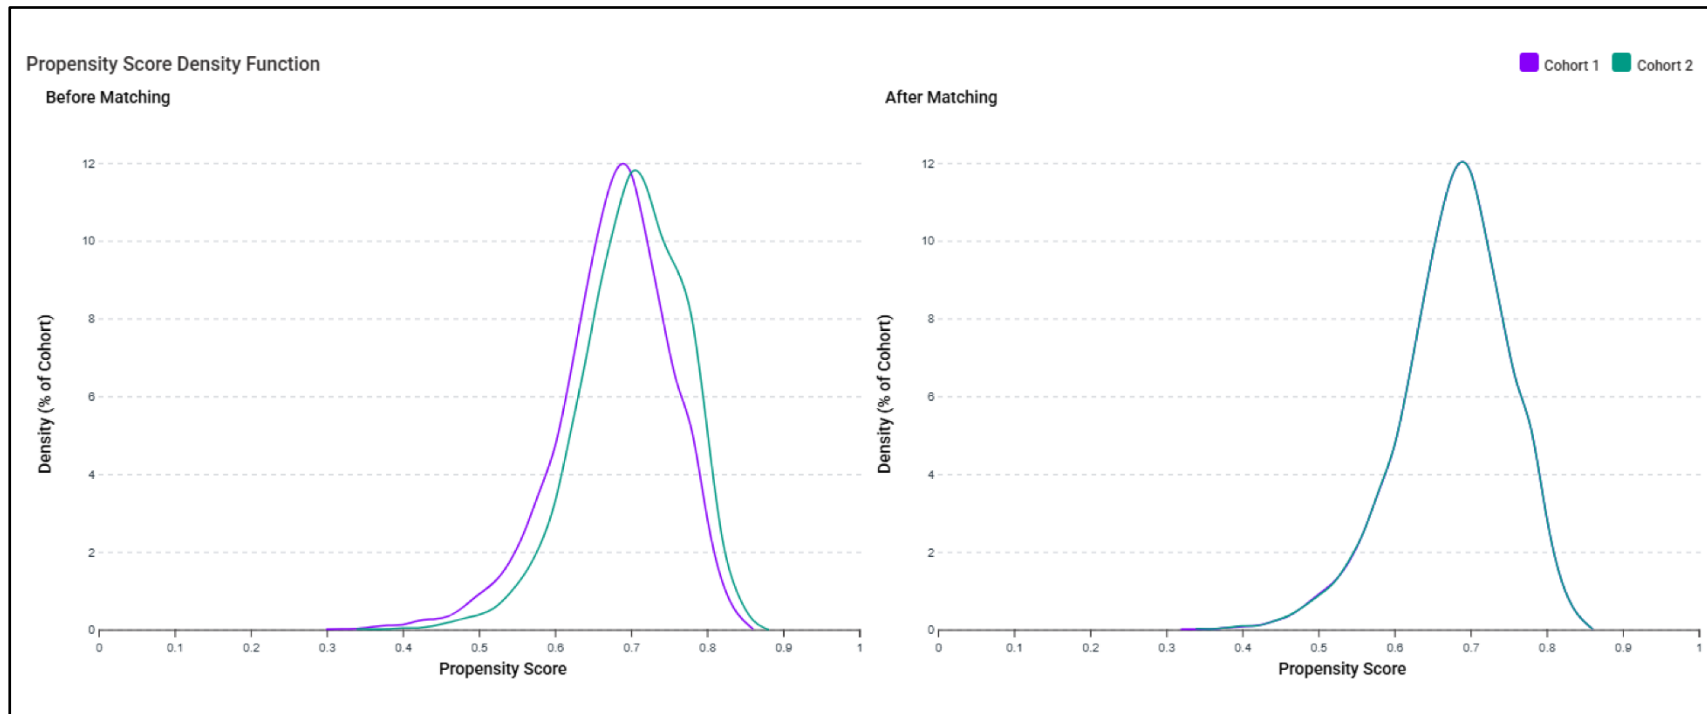

Supplement: Supplementary file 1 [file 569143 Supplemental Figure 1.pdf › 569143 Supplemental/569143 Supplemental Figure 1.pdf]
