# Supplementary material
Source: publisher site journal article supplement (https://www.dovepress.com/article/569143)
Supplement: Supplementary file 2 [file 569143 Supplemental Table 1.pdf › 569143 Supplemental/569143 Supplemental Table 1.pdf]

**Supplemental Table 1.** Subgroup analysis for 30-day postoperative outcomes

| Subgroups       | POAF             |          |                   | Other arrhythmias |          |                   |
|-----------------|------------------|----------|-------------------|-------------------|----------|-------------------|
|                 | HR (95% CI)      | p-values | P for interaction | HR (95% CI)       | p-values | P for interaction |
| Sex             |                  |          |                   |                   |          |                   |
| Male (n=3775)   | 1.19 (0.91-1.53) | 0.199    | Reference         | 1.31 (0.93-1.83)  | 0.118    | Reference         |
| Female (n=4480) | 1.19 (0.89–1.60) | 0.232    | 1.00              | 1.65 (1.16–2.37)  | 0.006    | 0.377             |
| Age             |                  |          |                   |                   |          |                   |
| 18-65 (n=4039)  | 1.11 (0.71-1.72) | 0.651    | Reference         | 1.36 (0.90-2.06)  | 0.139    | Reference         |
| ≥66 (n=4528)    | 1.38 (1.11–1.71) | 0.003    | 0.368             | 1.71 (1.25–2.33)  | <0.001   | 0.387             |

POAF: postoperative atrial fibrillation and flutter; HR: hazard ratio; CI: confidence interval
